# Supplementary material for: Evaluation of Circulating Tumor DNA as a Liquid Biomarker in Uveal Melanoma
Source: PubMed Central journal article supplement (PMC10854420; doi:10.1167/iovs.65.2.11), 2024-02-06
Supplement: iovs-65-2-11_s001.pdf [file iovs-65-2-11_s001.pdf]

# Evaluation of circulating tumor DNA as a liquid biomarker in uveal melanoma

Daniel P. de Bruyn<sup>1,2,3</sup>, Natasha M. van Poppelen<sup>1,2,3</sup>, Tom Brands<sup>2</sup>, Susanne C. van den Boom<sup>2</sup>, Ellis Eikelenboom<sup>2</sup>, Anja Wagner<sup>2</sup>, Monique M. van Veghel-Plandsoen<sup>2</sup>, Geert Geeven<sup>2</sup>, Berna Beverloo<sup>2</sup>, Robert M. Verdijk<sup>4,5</sup>, Nicole C. Naus<sup>1,2</sup>, Mette M. Bagger<sup>6,7</sup>, Jens F. Kiilgaard<sup>6</sup>, Annelies de Klein<sup>2,3</sup>, Erwin Brosens<sup>2,3†</sup> & Emine Kiliç<sup>1,3†,\*</sup>.

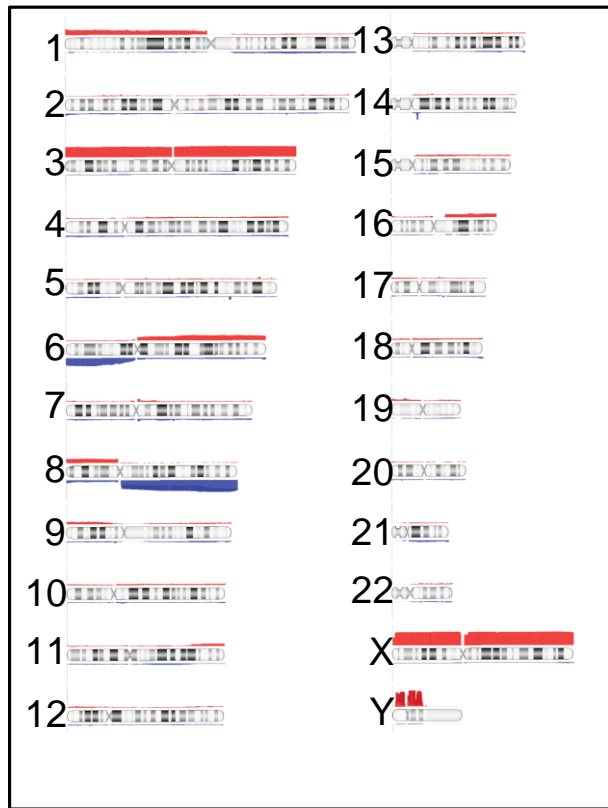

**a**

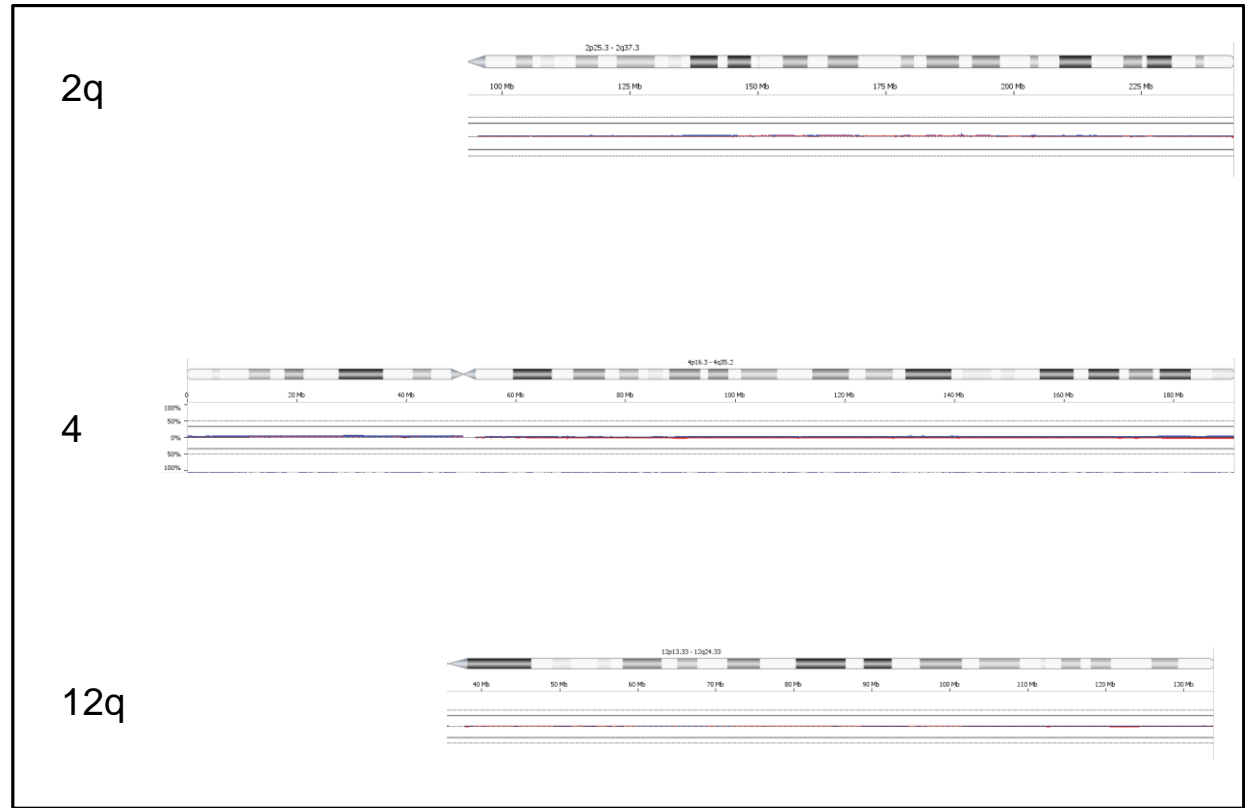

**b**

**Supplementary figure 1.** Distribution of chromosomal aberrations in Rotterdam Ocular Melanoma Study group (ROMS) uveal melanoma cohort. Uveal melanomas (UMs) are known to harbor few, typical, copy number variations. We have obtained 384 CNV-profiles of UMs by SNP-array. A loss is depicted in red above the respective chromosome and a gain is depicted in blue below the respective chromosome. In our cohort, a loss of chromosome 1, 3, 6q, and 8p and gain of chromosomes 6p and 8q are most frequently reported (**a**). The least frequently aberrated chromosome arms are 2q, 4 and 12q and have CNVs in less than five percent of the 384 UM-cases we evaluated by SNP-array (**b**).

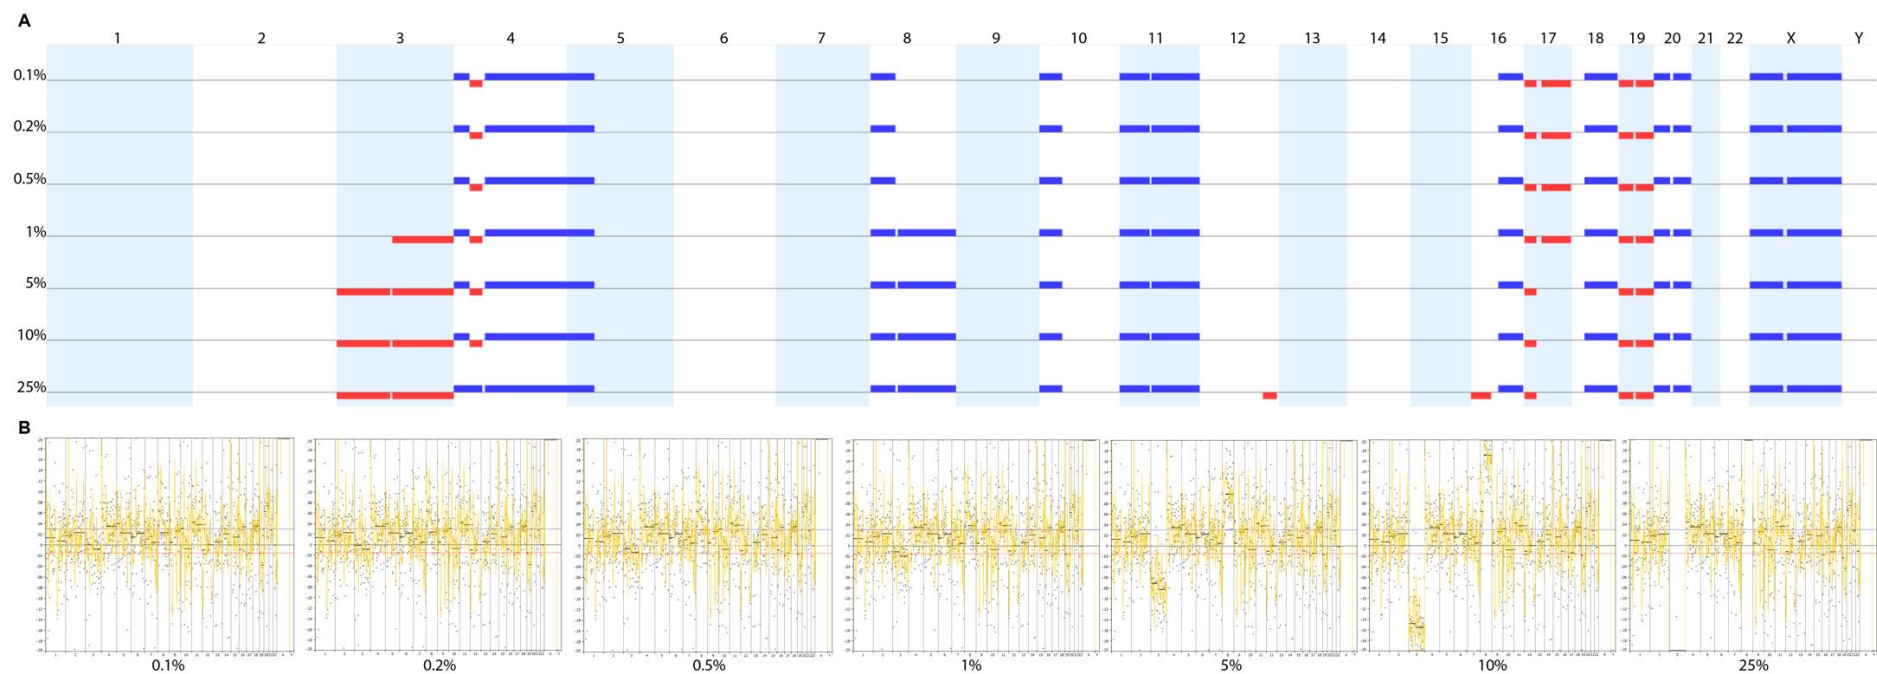

**Supplementary figure 2.** In silico spike in of chromosome 3 loss and chromosome 8q gain.

A concurrent loss of chromosome 3 and gain of chromosome 8q are correlated to the worst prognosis in UM. To derive a minimum fraction of tumor derived DNA in total cell free DNA, we made serial in-silico spike in dilutions of chromosome 3 loss and 8q gain. The dilutions show that with our pipeline we can detect 8q gain from 1% and chromosome 3 loss from 1%.

**Supplementary table 1.** Additional cohort description for patients included in this study. This includes the analyses patient samples were included in, the mutations found in the primary and secondary driver genes, BAP1 immunohistochemistry, and total follow-up. ctDNA was isolated to assess the abundance (n=18) and to derive copy number variation (CNV) profiles (n=26). Ten patients had ctDNA analyzed for both assessing abundance and CNV profiling. Tumor tissue was available for 22 of the 34 patients in this study. Abbreviations: fSRT: fractionated stereotactic radiotherapy; VUS: variant of unknown significance; CNV: copy number variation; IHC: immunohistochemistry; n.t.: not tested.

| Study ID | Cohort        | Subcohort                       | Time-point ctDNA abundance     | Time-point CNV profiling              | Primary driver mutation  | Secondary driver mutation                                         | BAP1 IHC | Follow-up |
|----------|---------------|---------------------------------|--------------------------------|---------------------------------------|--------------------------|-------------------------------------------------------------------|----------|-----------|
|          | Abundance     | Diagnosis&fSRT                  | localized and fSRT             | not applicable                        | GNAQ 626A>C Q209P        | EIF1AX c.7A>G; p.K3E                                              | Positive | 18.7      |
|          | Abundance     | Diagnosis&fSRT                  | localized and fSRT             | not applicable                        | GNA11 626A>T Q209L       | (VUS) EIF1AX c.5C>T; p.P2L                                        | Negative | 27.2      |
|          | Abundance     | Diagnosis&fSRT                  | localized and fSRT             | not applicable                        | GNAQ 626A>T Q209L        | MET c.467C>T; p.S156L                                             | Positive | 28.5      |
|          | Abundance     | Diagnosis&metastasis            | localized and metastatic       | not applicable                        | PLCB4 D630. 1888delinsTT | SF3B1 c.1873C>T; R625C                                            | Positive | 21        |
|          | Abundance     | Diagnosis&metastasis            | localized and metastatic       | not applicable                        | GNA11 c.626A>T Q209L     | n.t.<br>BAP1 c.2012-<br>2026delinsCATCG                           | Negative | 16.8      |
|          | Abundance     | Diagnosis&metastasis            | localized and metastatic       | not applicable                        | GNA11 c.626A>T Q209L     | 2026delinsCATCG                                                   | Negative | 44.6      |
|          | Abundance     | Metastasis                      | metastatic                     | not applicable                        | GNAQ 626A>C Q209P        | BAP1 (ex1): c.-3_15del                                            | Negative | 32.3      |
| 04       | Abundance&CNV | Diagnosis&metastasis&sWGS1      | localized and metastatic       | localized                             | GNAQ c.626A>C Q209P      | BAP1 c.141_154del; p.I47Afs                                       | Negative | 50.1      |
| 06       | Abundance&CNV | Diagnosis&metastasis&sWGS1      | localized and metastatic       | localized<br>localized and metastatic | GNAQ c.626A>T Q209L      | unknown                                                           | Positive | 25.5      |
| 07       | Abundance&CNV | Diagnosis&metastasis&sWGS1      | localized and metastatic       | detection                             | GNA11 c.626A>T (209L)    | n.t.                                                              | n.t.     | 9.1       |
| 18       | Abundance&CNV | Diagnosis&fSRT&sWGS2            | localized and fSRT             | fSRT                                  | GNA11 626A>T Q209L       | unknown<br>BAP1 c.947_954del;<br>p.A316Vfs*79                     | Negative | 31.6      |
| 20       | Abundance&CNV | Diagnosis&fSRT&sWGS2            | localized and fSRT             | localized and fSRT                    | GNAQ 626A>C Q209P        | BAP1 c.1313_1319del;<br>p.S438Cfs*131                             | Negative | 31.6      |
| 17       | Abundance&CNV | Diagnosis&fSRT&metastasis&sWGS2 | localized, fSRT,<br>metastatic | fSRT                                  | GNAQ: 626A>C Q209P       | BAP1 c.1985_1988del;<br>p.I662Mfs*29                              | Negative | 35.2      |
| 22       | Abundance&CNV | Diagnosis&metastasis&sWGS2      | localized and metastatic       | metastasis detection                  | GNA11 c.626A>T Q209L     | SF3B1 c.1873C>T; R625C and<br>BAP1 c.1951_1955del;<br>p.K651Gfs*3 | Negative | 16.7      |
| 23       | Abundance&CNV | Metastasis&sWGS2                | metastatic                     | metastatic follow-up                  | GNAQ 626A>T Q209L        | BAP1 (ex10): c.799_800del;<br>p.Q267Afs*16                        | Negative | 11.0      |
| 24       | Abundance&CNV | Metastasis&sWGS2                | metastatic                     | metastasis detection                  | GNAQ 626A>C Q209P        | BAP1 c.1671_1684del;<br>p.S558Afs*4                               | Negative | 26.9      |
| 26       | Abundance&CNV | Metastasis&sWGS2                | metastatic                     | metastasis detection                  | GNAQ 626A>C Q209P        | n.t.                                                              | Negative | 8.7       |
| 01       | CNV           | sWGS1                           | not applicable                 | post treatment follow-up              | GNAQ 626A>T Q209L        | n.t.                                                              | Negative | 11.3      |
| 02       | CNV           | sWGS1                           | not applicable                 | post treatment follow-up              | n.t.                     | n.t.                                                              | Negative | 153.2     |
| 03       | CNV           | sWGS1                           | not applicable                 | post treatment follow-up              | n.t.                     | n.t.                                                              | n.t.     | 387       |
| 05       | CNV           | sWGS1                           | localized                      | localized                             | n.t.                     | n.t.                                                              | Negative | 19.4      |
| 08       | CNV           | sWGS1                           | not applicable                 | localized                             | n.t.                     | n.t.                                                              | n.t.     | 4.9       |
| 09       | CNV           | sWGS1                           | not applicable                 | localized                             | n.t.                     | n.t.                                                              | n.t.     | 61.3      |
| 10       | CNV           | sWGS1                           | not applicable                 | localized                             | n.t.                     | n.t.                                                              | n.t.     | 56.9      |
| 11       | CNV           | sWGS1                           | not applicable                 | post treatment follow-up              | n.t.                     | n.t.                                                              | n.t.     | 83.6      |
| 12       | CNV           | sWGS1                           | not applicable                 | localized                             | n.t.                     | n.t.                                                              | n.t.     | 2.9       |

|    |           |            |                |                      |                      |                                     |          |       |
|----|-----------|------------|----------------|----------------------|----------------------|-------------------------------------|----------|-------|
| 13 | CNV       | sWGS1      | not applicable | metastasis detection | GNAQ 626A>C Q209P    | BAP1 c.302T>C; p.L101P              | Negative | 60.2  |
| 14 | CNV       | sWGS1      | not applicable | metastatic follow-up | n.t.                 | n.t.                                | n.t.     | 25.1  |
| 15 | CNV       | sWGS1      | not applicable | metastatic follow-up | GNAQ 626A>T Q209L    | BAP1 c.1582_1583del;<br>p.S528Ofs*8 | Negative | 51.6  |
| 16 | CNV       | sWGS2      | not applicable | fSRT                 | n.t.                 | n.t.                                | n.t.     | 27.8  |
| 21 | CNV       | sWGS2      | not applicable | metastasis detection | GNA11 626AG>TT Q209L | BAP1 c.1838del;<br>p.T613Afs*4      | Negative | 87.1  |
| 19 | CNV       | sWGS2      | not applicable | fSRT                 | n.t.                 | n.t.                                | n.t.     | 31.1  |
| 25 | CNV       | sWGS2      | not applicable | metastatic follow-up | n.t.                 | n.t.                                | n.t.     | 24.9  |
|    | Abundancy | Metastasis | metastatic     | not applicable       | GNAQ 626A>C Q209P    | unknown                             | n.t.     | 245.4 |

\* Targeted sequencing did not reveal the driver mutation (*BAP1*, *SF3B1* and *EIF1AX*) in one patient
